# Supplementary material for: A Comparative Analysis of Sonic Defences in Bombycoidea Caterpillars
Source: PubMed Central journal article supplement (PMC4980592; doi:10.1038/srep31469), 2016-08-11
Supplement: srep31469-s3.pdf [file srep31469-s3.pdf]

## A Comparative Analysis of Sonic Defences in Bombycoidea Caterpillars

Veronica L. Bura<sup>1</sup>, Akito Y. Kawahara<sup>2</sup>, Jayne E. Yack<sup>1\*</sup>

<sup>1</sup>Department of Biology, Carleton University, 1125 Colonel By Drive, Ottawa, Ontario, K1S 5B6, Canada

<sup>2</sup>Florida Museum of Natural History, University of Florida, Gainesville, Florida, 32611, USA

\*Corresponding author: Dr. Jayne E. Yack, Department of Biology, Carleton University, 1125 Colonel By Drive, Ottawa, ON, Canada, K1S 5B6; Email: jayneyack@cunet.carleton.ca; Tel: 613 520 2600 (Ext. 3887)

### Supplementary Table 1

Summary of all species examined for defensive behaviours between 2005-2014.

| Taxonomic Group <sup>a</sup> |                |                                              | Collection Data                  |                                                                   |                                 | Sound Production |          |
|------------------------------|----------------|----------------------------------------------|----------------------------------|-------------------------------------------------------------------|---------------------------------|------------------|----------|
| Family                       | Subfamily      | Species                                      | No. of specimens (No. of broods) | Food plant                                                        | Collection location             | Y/N              | Type     |
| Bombycidae                   | Bombycinae     | <i>Bombyx mori</i><br>Linnaeus               | 10                               | <i>Morus rubra</i>                                                | Ottawa, ON (Pet store)          | No               | n/a      |
|                              | Apatelodinae   | <i>Hygrochroa torrefacta</i><br>Smith        | 28                               | <i>Prunus</i> sp.                                                 | Arizona                         | No               | n/a      |
|                              |                | <i>Olceclostera angelica</i><br>(Grote)      | 50+ (2)                          | <i>Fraxinus</i> sp.,<br><i>Syringa</i> sp.                        | Chaffey's Lock (QUBS), ON       | No               | n/a      |
| Saturniidae                  | Ceratocampinae | <i>Anisota virginiensis</i><br>(Drury)       | 70+ (2)                          | <i>Quercus</i> sp.                                                | Chaffey's Lock (QUBS), ON       | No               | n/a      |
|                              |                | <i>Citheronia lobesis</i><br>Rothschild      | 2                                | <i>Cochlospermum vitifolium</i>                                   | Costa Rica, Guanacaste          | Yes              | Chirping |
|                              |                | <i>Citheronia splendens</i><br>(Druce)       | 50+                              | <i>Rhus</i> sp.                                                   | Arizona                         | No               | n/a      |
|                              |                | <i>Dryocampa rubicunda</i> (Fabricius)       | 85+ (2)                          | <i>Acer saccharum</i>                                             | Ottawa (Mer Bleue), ON & PEI    | No               | n/a      |
|                              |                | <i>Eacles imperialis</i><br>(Drury)          | 50+ (2)                          | <i>Pinus</i> sp., <i>Picea</i> sp.                                | Chaffey's Lock (QUBS), ON       | No               | n/a      |
|                              |                | <i>Eacles ormondei</i><br>Schaus             | 1                                | <i>Tapirira mexicana</i>                                          | Costa Rica                      | No               | n/a      |
|                              |                | <i>Eacles oslari</i><br>Rothschild           | 5                                | <i>Quercus alba</i>                                               | Arizona                         | No               | n/a      |
|                              |                | <i>Schausiella santarosensis</i><br>Lemaire  | 3                                | <i>Hymenaea courbaril</i>                                         | Costa Rica                      | Yes              | Chirping |
|                              | Hemilucinae    | <i>Automeris postalbida</i><br>Schaus        | 1                                | <i>Acalypha diversifolia</i>                                      | Costa Rica                      | No               | n/a      |
|                              |                | <i>Automeris io</i><br>(Fabricius)           | 80+ (3)                          | <i>Betula papyrifera</i> ,<br><i>Acer</i> sp., <i>Populus</i> sp. | Chaffey's Lock (QUBS), ON & PEI | No               | n/a      |
|                              |                | <i>Automeris phrynon</i><br>Druce            | 1                                | <i>Terminalia catappa</i>                                         | Costa Rica                      | No               | n/a      |
|                              |                | <i>Automeris cecrops pamina</i><br>Neumoegen | 10+                              | <i>Quercus</i> sp.                                                | Arizona                         | No               | n/a      |
|                              | Saturniinae    | <i>Actias luna</i>                           | 100+ (3)                         | <i>Betula papyrifera</i>                                          | Chaffey's Lock                  | Yes              | Clicking |

|            |            |                                                |          |                                                                                                       |                                                                            |     |          |
|------------|------------|------------------------------------------------|----------|-------------------------------------------------------------------------------------------------------|----------------------------------------------------------------------------|-----|----------|
|            |            | (Linnaeus)                                     |          |                                                                                                       | (QUBS), & Ottawa (Mer Bleue), ON                                           |     |          |
|            |            | <i>Antheraea pernyi</i> (Guérin-Ménéville)     | 2        | <i>Quercus</i> sp.                                                                                    | Italy                                                                      | Yes | Clicking |
|            |            | <i>Antheraea polyphemus</i> (Cramer)           | 200+ (3) | <i>Quercus rubra</i> ,<br><i>Betula papyrifera</i> ,<br><i>Acer saccharum</i>                         | Chaffey's Lock (QUBS), & Ottawa (Mer Bleue), ON & PEI & Massachusetts      | Yes | Clicking |
|            |            | <i>Antheraea polyphemus oculea</i> (Neumoegen) | 45       | <i>Quercus</i> sp.                                                                                    | Arizona                                                                    | Yes | Clicking |
|            |            | <i>Attacus atlas</i> (Linnaeus)                | 8        | <i>Citrus</i> sp.                                                                                     | South East Asia                                                            | No  | n/a      |
|            |            | <i>Callosamia promethea</i> (Drury)            | 34 (3)   | <i>Betula</i> sp.                                                                                     | Chaffey's Lock (QUBS), ON & PEI                                            | Yes | Clicking |
|            |            | <i>Calosaturnia mendocino</i> (Behrens)        | 4        | <i>Arctostaphylos</i> sp. or <i>Arbutus menziesii</i>                                                 | California                                                                 | Yes | Chirping |
|            |            | <i>Eupackardia calleta</i> (Westwood)          | 2        | <i>Prunus domestica</i>                                                                               | Arizona                                                                    | No  | n/a      |
|            |            | <i>Hyalophora cecropia</i> (Linnaeus)          | 20+      | <i>Betula papyrifera</i>                                                                              | Chaffey's Lock (QUBS)                                                      | No  | n/a      |
|            |            | <i>Hyalophora columbia</i> (SI Smith)          | 20+      | <i>Betula</i> sp.                                                                                     | Arizona                                                                    | No  | n/a      |
|            |            | <i>Hyalophora columbia gloveri</i> (Strecker)  | 6        | <i>Prunus domestica</i>                                                                               | Arizona                                                                    | No  | n/a      |
|            |            | <i>Hyalophora euryalus</i> (Boisduval)         | 2        | <i>Prunus</i> sp.                                                                                     | Arizona                                                                    | No  | n/a      |
|            |            | <i>Rhodinia fugax</i> * (Butler)               | n/a      | n/a                                                                                                   | n/a                                                                        | Yes | Whistle  |
|            |            | <i>Saturnia pyri</i> (Denis & Schifferrmüller) | 52 (2)   | <i>Populus</i> sp.                                                                                    | Denmark & Switzerland                                                      | Yes | Chirping |
| Sphingidae | Sphinginae | <i>Acherontia atropos</i> (Linnaeus)           | 5        | <i>Solanum</i> sp.                                                                                    | Africa                                                                     | Yes | Clicking |
|            |            | <i>Ceratonia undulosa</i> (Walker)             | 20       | <i>Fraxinus</i> sp.                                                                                   | Chaffey's Lock (QUBS), ON                                                  | No  | n/a      |
|            |            | <i>Manduca albiplaga</i> (Walker)              | 1        | <i>Annona rensoniana</i>                                                                              | Costa Rica                                                                 | No  | n/a      |
|            |            | <i>Manduca florestan</i> (Stoll)               | 1        | plant 19080 ( <i>Bignoniaceae</i> )                                                                   | Costa Rica                                                                 | No  | n/a      |
|            |            | <i>Manduca pellenia</i> (Herrich-Schaffer)     | 1        | <i>Cestrum megalophyllum</i>                                                                          | Costa Rica                                                                 | Yes | Clicking |
|            |            | <i>Manduca sexta</i> (Linnaeus)                | 60+ (3)  | <i>Solanum lycopersicum</i> ,<br><i>Datura inoxia</i> ,<br><i>Nicotiana tabacum</i> , Artificial diet | Dalhousie University, NS & Mercier (supplier), QC & Windsor (supplier), ON | Yes | Clicking |
|            |            | <i>Sphinx chersis</i> (Hubner)                 | 1        | <i>Fraxinus</i> sp.                                                                                   | Ottawa, ON                                                                 | No  | n/a      |
|            |            | <i>Sphinx drupiferarum</i> Abbot & Smith       | 16       | <i>Prunus</i> sp. (plum)                                                                              | PEI                                                                        | No  | n/a      |
|            |            | <i>Sphinx kalmiae</i> Abbot & Smith            | 20       | <i>Fraxinus</i> sp.                                                                                   | PEI                                                                        | No  | n/a      |

|                  |                |                                                     |          |                                                                           |                                        |     |              |
|------------------|----------------|-----------------------------------------------------|----------|---------------------------------------------------------------------------|----------------------------------------|-----|--------------|
|                  |                | <i>Sphinx poecila</i><br>Stephens                   | 18       | <i>Vaccinium</i> sp.                                                      | PEI                                    | No  | n/a          |
|                  | Smerinthinae   | <i>Adhemarius ypsilon</i><br>(Rothschild & Jordan)  | 1        | <i>Ocotea atirrensis</i>                                                  | Costa Rica                             | No  | n/a          |
|                  |                | <i>Amorpha juglandis</i><br>(Abbot & Smith)         | 18 (2)   | <i>Ostyra</i> sp., <i>Alnus</i> sp., <i>Juglans</i> sp., <i>Fagus</i> sp. | Chaffey's Lock (QUBS), ON              | Yes | Whistle      |
|                  |                | <i>Mimas tiliae</i><br>(Linnaeus)                   | 3        | <i>Alnus</i> sp.                                                          | Europe                                 | No  | n/a          |
|                  |                | <i>Pachysphinx modesta</i><br>(Harris)              | 8        | <i>Populus tremuloides</i>                                                | PEI                                    | No  | n/a          |
|                  |                | <i>Paonias excaecata</i><br>(Abbot & Smith)         | 14 (2)   | <i>Betula</i> sp.                                                         | Chaffey's Lock (QUBS), ON & PEI        | No  | n/a          |
|                  |                | <i>Paonias myops</i><br>(Abbot & Smith)             | 20       | <i>Prunus</i> sp. (cherry)                                                | Chaffey's Lock (QUBS), ON              | No  | n/a          |
|                  |                | <i>Phyllosphingia dissimilis</i> * (Bremer)         | n/a      | n/a                                                                       | n/a                                    | Yes | Whistle      |
|                  |                | <i>Smerinthus cerisyi</i><br>Kirby                  | 10       | <i>Populus tremuloides</i>                                                | Ottawa (Mer Bleue), ON                 | No  | n/a          |
|                  |                | <i>Smerinthus jamaicensis</i> (Drury)               | 5        | <i>Populus tremuloides</i>                                                | Ottawa (Mer Bleue), ON                 | No  | n/a          |
|                  | Macroglossinae | <i>Amphion floridensis</i><br>Clark                 | 130+ (2) | <i>Vitis</i> sp.                                                          | Florida                                | Yes | Vocalization |
|                  |                | <i>Darapsa choerilus</i><br>(Cramer)                | 5        | <i>Viburnum</i> sp.                                                       | PEI                                    | No  | n/a          |
|                  |                | <i>Darapsa myron</i><br>(Cramer)                    | 50+ (2)  | <i>Vitis</i> sp.                                                          | Ottawa, ON & Chaffey's Lock (QUBS), ON | No  | n/a          |
|                  |                | <i>Deidamia inscriptum</i><br>(Harris)              | 1        | <i>Vitis</i> sp.                                                          | Chaffey's Lock (QUBS), ON              | No  | n/a          |
|                  |                | <i>Eumorpha satellitia</i><br>(Linnaeus)            | 2        | <i>Vitis tiliifolia</i>                                                   | Costa Rica                             | Yes | Clicking     |
|                  |                | <i>Hyles euphorbiae</i><br>(Linnaeus)               | 3        | <i>Euphorbia</i> sp.                                                      | Ottawa                                 | No  | n/a          |
|                  |                | <i>Hyles lineata</i><br>(Fabricius)                 | 5        | <i>Oenothera</i> sp.                                                      | Arizona                                | No  | n/a          |
|                  |                | <i>Nyceryx magna</i><br>(Felder)                    | 1        | <i>Pentagonia donnell-smithii</i>                                         | Costa Rica                             | Yes | Vocalization |
|                  |                | <i>Pachygonidia drucei</i><br>(Rothschild & Jordan) | 1        | <i>Doliocarpus multiflorus</i>                                            | Costa Rica                             | Yes | Vocalization |
|                  |                | <i>Sphecodina abbottii</i><br>(Swainson)            | 3        | <i>Vitis</i> sp.                                                          | Ottawa, ON                             | Yes | Vocalization |
|                  |                | <i>Xylophanes anubus</i><br>(Cramer)                | 1        | <i>Psychotria panamensis</i>                                              | Costa Rica                             | No  | n/a          |
|                  |                | <i>Xylophanes tyndarus</i><br>(Boisduval)           | 1        | <i>Faramea occidentalis</i>                                               | Costa Rica                             | No  | n/a          |
|                  |                | <i>Xylophanes falco</i><br>(Walker)                 | 4        | <i>Bouvardia glaberrima</i>                                               | Arizona                                | No  | n/a          |
| <b>OUTGROUPS</b> |                |                                                     |          |                                                                           |                                        |     |              |
| Lasiocampidae    | Macromphalinae | <i>Euglyphis amathuria</i> DHJ02                    | 1        | <i>Cinnamomum brenesii</i>                                                | Costa Rica                             | No  | n/a          |

|              |              |                                       |   |                                     |            |    |     |
|--------------|--------------|---------------------------------------|---|-------------------------------------|------------|----|-----|
| Noctuidae    | Catocalinae  | <i>Acanthodica sinuilinea</i> DHJ02   | 1 | <i>Heteropterys obovata</i>         | Costa Rica | No | n/a |
| Notodontidae | Dudusinae    | <i>Crinodes besckei</i>               | 1 | <i>Gouania</i> sp.                  | Costa Rica | No | n/a |
|              | Dicranurinae | <i>Lirimiris fascis</i>               | 1 | <i>Mortoniodendron guatemalense</i> | Costa Rica | No | n/a |
|              |              | <i>Lirimiris guatemalensis</i>        | 1 | <i>Guazuma ulmifolia</i>            | Costa Rica | No | n/a |
| Nymphalidae  | Morphinae    | <i>Antirrhea lindigii</i> Felder      | 1 | <i>Geonoma ferruginea</i>           | Costa Rica | No | n/a |
|              |              | <i>Morpho amathonte</i> Deyrolle      | 1 | <i>Lonchocarpus oliganthus</i>      | Costa Rica | No | n/a |
|              | Nymphalinae  | <i>Smyrna blomfieldia</i> (Fabricius) | 1 | <i>Urera caracasana</i>             | Costa Rica | No | n/a |
|              | Danainae     | <i>Danaus</i> sp.                     | 1 | <i>Solandra grandiflora</i>         | Costa Rica | No | n/a |
| Hesperiidae  | Eudaminae    | <i>Astraptes creteus crana</i> Evans  | 1 | <i>Styrax argenteus</i>             | Costa Rica | No | n/a |

<sup>a</sup> “Taxa names were obtained from the Natural History Museum, London, U.K. Lepindex website. Beccaloni, G. et al., *Natural History Museum - The Global Lepidoptera Names Index*. (2005) Available at: <http://www.nhm.ac.uk/our-science/data/lepindex/>. (Accessed: 15th July 2015)”

\* Information on *Rhodinia fugax* is from the literature and non-lab created videos. Information on *Phyllosphingia dissimilis* is from the literature only.

## Supplementary Table 2

**Taxa and their GenBank accession numbers for each locus used to construct the ML tree in this study.**

| Family      | Genus/species                    | CAD      | COI      | DDC      | EF1      | WG       |
|-------------|----------------------------------|----------|----------|----------|----------|----------|
| Saturniidae | <i>Actias luna</i>               | *        | GU087182 | *        | AF015069 | *        |
| Saturniidae | <i>Anisota virginensis</i>       | *        | GU087657 | *        | *        | *        |
| Saturniidae | <i>Antheraea pernyi</i>          | *        | EU532613 | AY461438 | FJ788508 | *        |
| Saturniidae | <i>Antheraea polyphemus</i>      | EU032645 | GU438053 | AF373953 | AF373927 | EU033059 |
| Saturniidae | <i>Attacus atlas</i>             | EU032631 | AB533579 | EU032768 | AF015066 | EU033049 |
| Saturniidae | <i>Automeris io</i>              | EU032648 | GU088608 | EU032784 | *        | EU033062 |
| Saturniidae | <i>Automeris phrynon</i>         | *        | GU146236 | *        | *        | *        |
| Saturniidae | <i>Automeris postalbida</i>      | *        | JQ529319 | *        | *        | *        |
| Saturniidae | <i>Callosamia promethea</i>      | *        | *        | AF015052 | AF015073 | *        |
| Saturniidae | <i>Ceratomia undulosa</i>        | *        | GU438133 | *        | *        | *        |
| Saturniidae | <i>Citheronia lobesis</i>        | *        | JQ570223 | *        | *        | *        |
| Saturniidae | <i>Dryocampa rubicunda</i>       | *        | GU087259 | *        | AF234564 | *        |
| Saturniidae | <i>Eacles ormondei</i>           | *        | JQ579310 | *        | *        | *        |
| Saturniidae | <i>Eupackardia calleta</i>       | *        | *        | AF015054 | AF015075 | *        |
| Saturniidae | <i>Hyalophora cecropia</i>       | EU032685 | KM287185 | EU032818 | AF015077 | EU033090 |
| Saturniidae | <i>Hyalophora columbia</i>       | *        | KM287192 | *        | *        | *        |
| Saturniidae | <i>Hyalophora euryalus</i>       | EU032687 | HM867376 | AF015057 | AF015078 | *        |
| Saturniidae | <i>Rhodinia fugax</i>            | *        | GU663933 | AF015061 | *        | *        |
| Saturniidae | <i>Calosaturnia mendocino</i>    | *        | *        | EU032878 | AF373945 | EU033146 |
| Saturniidae | <i>Saturnia pyri</i>             | *        | JN278459 | *        | DQ077816 | *        |
| Saturniidae | <i>Schausiella santarosensis</i> | *        | DQ266740 | *        | *        | *        |
| Sphingidae  | <i>Acherontia atropos</i>        | EU479012 |          | EU479122 | EU479232 | EU479446 |
| Sphingidae  | <i>Amorpha juglandis</i>         | EU479021 | GU088582 | EU479131 | EU479241 | EU479455 |
| Sphingidae  | <i>Amphion floridensis</i>       | *        | JN677742 | *        | EU479244 | EU479458 |
| Sphingidae  | <i>Darapsa myron</i>             | EU479045 | KP720048 | EU479155 | EU479266 | EU479480 |
| Sphingidae  | <i>Deidamia inscriptum</i>       | EU479046 | KP720047 | EU479156 | *        | EU479481 |
| Sphingidae  | <i>Eumorpha satellitia</i>       | *        | HQ581557 | *        | KP720269 | KM456038 |
| Sphingidae  | <i>Hyles euphorbiae</i>          | *        | HQ955341 | *        | *        | FN393414 |

|              |                                  |          |          |          |             |          |
|--------------|----------------------------------|----------|----------|----------|-------------|----------|
| Sphingidae   | <i>Hyles lineata</i>             | EU032688 | JN678058 | EU479176 | EU479288    | EU033092 |
| Sphingidae   | <i>Manduca albiplaga</i>         | KC893229 | GU152246 | *        | KC893193    | KC893213 |
| Sphingidae   | <i>Manduca florestan</i>         | *        | JQ572523 | EU479186 | EU479298    | EU479511 |
| Sphingidae   | <i>Manduca pellenia</i>          | KC893240 | DQ276326 | *        | KC893201    | KC893216 |
| Sphingidae   | <i>Manduca sexta</i>             | EU032707 | HQ581428 | U03909   | AF234571    | EU033109 |
| Sphingidae   | <i>Mimas tiliae</i>              | EU479079 | KP720098 | EU479192 | EU479304    | EU479517 |
| Sphingidae   | <i>Nyceryx magna</i>             | *        | DQ276382 | EU479196 | EU479310    | EU479523 |
| Sphingidae   | <i>Pachygonidia drucei</i>       | *        | DQ276419 | *        | *           | *        |
| Sphingidae   | <i>Pachysphinx modesta</i>       | *        | JN678337 | *        | AF234573    | *        |
| Sphingidae   | <i>Paonias excaecata</i>         | *        | GU090083 | *        | AF234572    | *        |
| Sphingidae   | <i>Paonias myops</i>             | *        | GU091309 | EU479202 | AF234574    | EU033131 |
| Sphingidae   | <i>Phyllosphinxia dissimilis</i> | EU479095 | JN678367 | EU479207 | EU479320    | EU479533 |
| Sphingidae   | <i>Smerinthus cerisyi</i>        | *        | HM862530 | AF234595 | AF234576    | *        |
| Sphingidae   | <i>Smerinthus jamaicensis</i>    | *        | JN678502 | *        | *           | *        |
| Sphingidae   | <i>Sphecodina abbottii</i>       | EU479106 | GU089266 | EU479218 | AF234575    | EU479544 |
| Sphingidae   | <i>Sphinx chersis</i>            | *        | GU438647 | AF234596 | AF234577    | *        |
| Sphingidae   | <i>Sphinx drupiferarum</i>       | *        | HM867045 | *        | *           | *        |
| Sphingidae   | <i>Sphinx kalmiae</i>            | EU479111 | GU091429 | EU479223 | EU479336    | EU479549 |
| Sphingidae   | <i>Sphinx poecila</i>            | *        | GU092657 | *        | *           | *        |
| Sphingidae   | <i>Xylophanes anubus</i>         | KP719988 | DQ276577 | *        | *           | KP720004 |
| Sphingidae   | <i>Xylophanes falco</i>          | *        | *        | KP720009 | AF234580    | *        |
| Apatelodidae | <i>Apatelodes torrefacta</i>     | EU032647 | GU089655 | EU032783 | *           | EU033061 |
| Bombycidae   | <i>Bombyx mori</i>               | EU032656 | AB649182 | AF372836 | NM001044045 | EU033069 |
| Erebinae     | <i>Acanthodica sinuilinea</i>    | *        | JQ523982 | *        | *           | *        |
| Hesperiidae  | <i>Astraptus creteus crana</i>   | *        | JF777604 | *        | *           | *        |
| Notodontidae | <i>Lirimiris guatemalensis</i>   | JQ784619 | GU158132 | *        | *           | JQ786889 |
| Notodontidae | <i>Crinodes besckei</i>          | JQ784377 | GU332885 | JQ785738 | *           | JQ786709 |
| Nymphalidae  | <i>Smyrna blomfieldia</i>        | *        | JQ548137 | *        | AY788816    | AY788576 |
| Nymphalidae  | <i>Danaus plexippus</i>          | *        | GU659709 | *        | KJ496142    | JQ786769 |
| Nymphalidae  | <i>Antirrhoea lindigii</i>       | *        | GU156905 | *        | *           | *        |
| Nymphalidae  | <i>Morpho amathonte</i>          | *        | JQ536411 | *        | *           | JN696117 |

**Supplementary Figure 1:** Supplementary Figure x. RAxML maximum likelihood tree showing branch lengths and outgroups. Bootstrap values >50% are shown above branches.

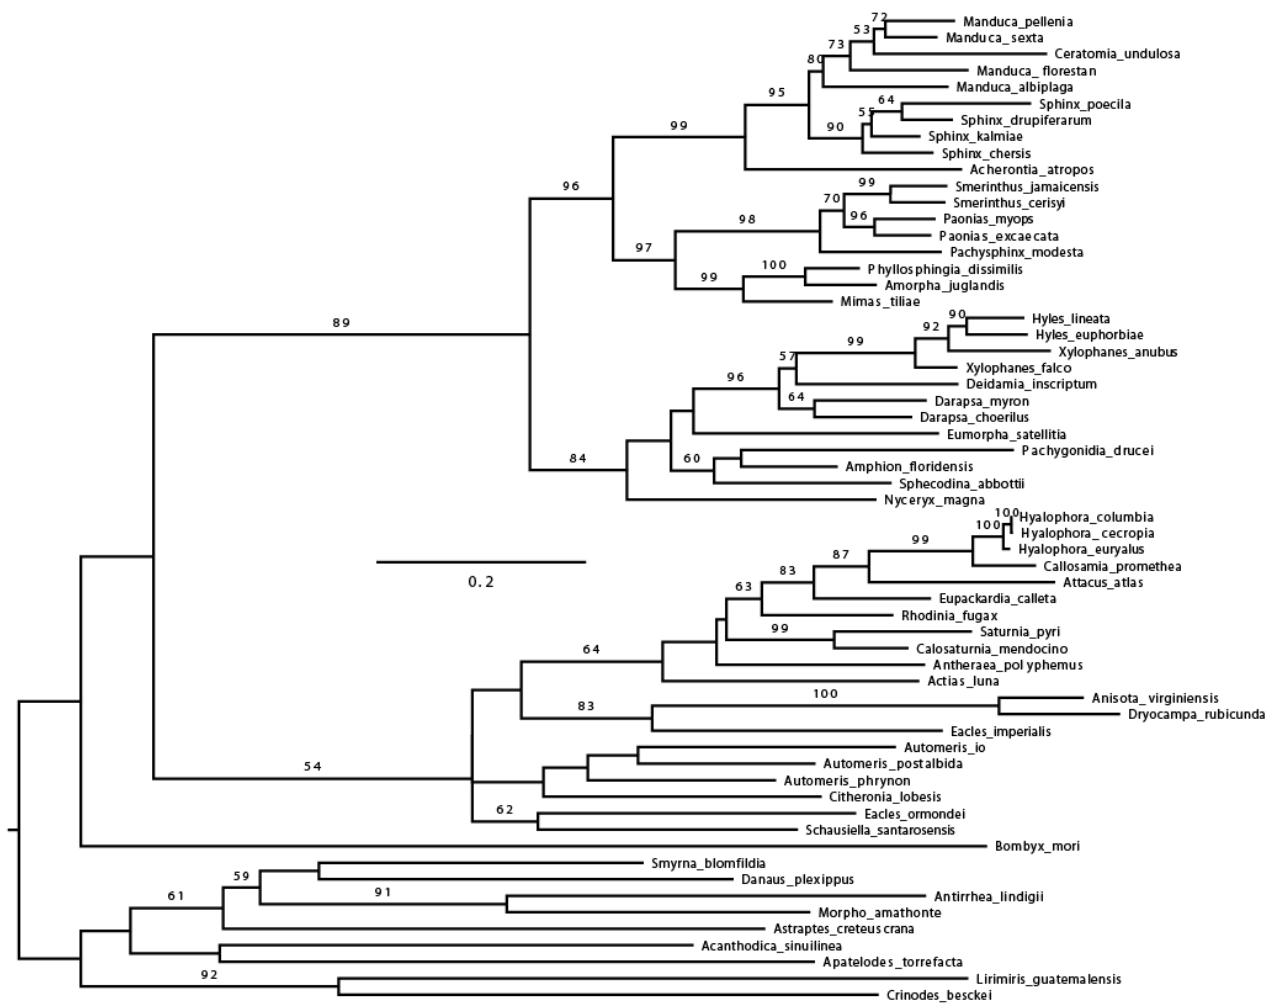

**Supplementary Movie 1 (Caption)**

Defensive sounds in caterpillars belonging to the silk and hawk moths (Bombycoidea). Videoclips show four different sound producing mechanisms (clicking, chirping, whistling and vocalizing) following simulated predator attacks.

**Supplementary Movie 2 (Caption)**

Close up video of mouthparts during ‘vocalization’ sound production in the Abbott’s sphinx (*Sphecodina abbottii*). The first part of the video is played in real time, and the second part is slowed down to show how mouth-parts are held wide open during sound production.
